# Supplementary material for: Adaptive fusion of structure and attribute guided polarized communities search
Source: Springer Nature journal article supplement (doi:10.1007/s11704-023-2776-7), 2023-12-02
Supplement: 11704_2023_2776_MOESM1_ESM.pdf [file 11704_2023_2776_MOESM1_ESM.pdf]

# Adaptive Fusion of Structure and Attribute Guided Polarized Communities Search

**Fanyi YANG, Huifang MA, Wentao WANG, Zhixin LI,  
Liang CHANG**

Frontiers of Computer Science, DOI: [10.1007/s11704-023-2776-7](https://doi.org/10.1007/s11704-023-2776-7)

# Problems & Ideas

- Problems of Polarized Communities Search:
  - Most existing methods primarily rely on topological structure while disregarding node attributes.
  - Global criteria-based polarized community detection aims to identify all polarized communities, neglecting personalized analyses centered around individual users.
- Ideas: **A novel community search framework for identifying polarized communities in attributed signed networks by leveraging the rich information inherent in node attributes and integrating it with the network's topological structure.**

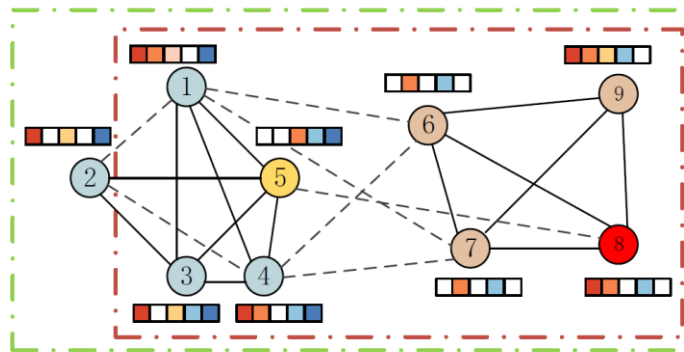

An example of the polarized communities in an attributed signed network. Solid edges are positive, while dashed edges are negative. The polarized communities where the green box is located utilize topology, while the polarized communities where the red box is located consider both topology and attribute.

# Main Contributions

- Contributions:
  - Providing a unified way to model a new augmented signed graph that adaptively takes into account both topology and node attributes;
  - Using the generalized Rayleigh quotient, the sparse indicator vector is solved by normalizing the Laplacian matrix span eigenspace and discrete rounding is performed to obtain the polarized communities.

**Table 1** Comparisons of overall performance between PCAS and baselines

| Methods          | Epinions     |              |              | Slashdot     |              |              |
|------------------|--------------|--------------|--------------|--------------|--------------|--------------|
|                  | precision    | recall       | F1           | precision    | recall       | F1           |
| PolarSeeds       | 0.747        | 0.711        | 0.729        | 0.785        | 0.769        | 0.777        |
| RE               | 0.631        | 0.618        | 0.624        | 0.674        | 0.658        | 0.667        |
| Timbal           | 0.673        | 0.652        | 0.662        | 0.719        | 0.694        | 0.706        |
| PolarSeeds+Attri | 0.754        | 0.729        | 0.741        | 0.799        | 0.782        | 0.790        |
| Timbal+Attri     | 0.689        | 0.671        | 0.680        | 0.782        | 0.716        | 0.722        |
| PCAS-noAttri     | 0.729        | 0.706        | 0.717        | 0.773        | 0.756        | 0.764        |
| PCAS-Factor      | 0.774        | 0.743        | 0.758        | 0.803        | 0.797        | 0.801        |
| <b>PCAS</b>      | <b>0.793</b> | <b>0.750</b> | <b>0.771</b> | <b>0.821</b> | <b>0.804</b> | <b>0.812</b> |
